# Supplementary material
Source: PubMed Central journal article supplement (PMC5516645)
Supplement: NIHMS877624-supplement-Supplemental_Materials.pdf [file NIHMS877624-supplement-Supplemental_Materials.pdf]

**Cell Host & Microbe, Volume 21**

## **Supplemental Information**

### **Commensal Microbes and Hair Follicle**

#### **Morphogenesis Coordinately Drive**

#### **Treg Migration into Neonatal Skin**

**Tiffany C. Scharschmidt, Kimberly S. Vasquez, Mariela L. Pauli, Elizabeth G. Leitner, Kevin Chu, Hong-An Truong, Margaret M. Lowe, Robert Sanchez Rodriguez, Niwa Ali, Zoltan G. Laszik, Justin L. Sonnenburg, Sarah E. Millar, and Michael D. Rosenblum**

## Supplementary Figures

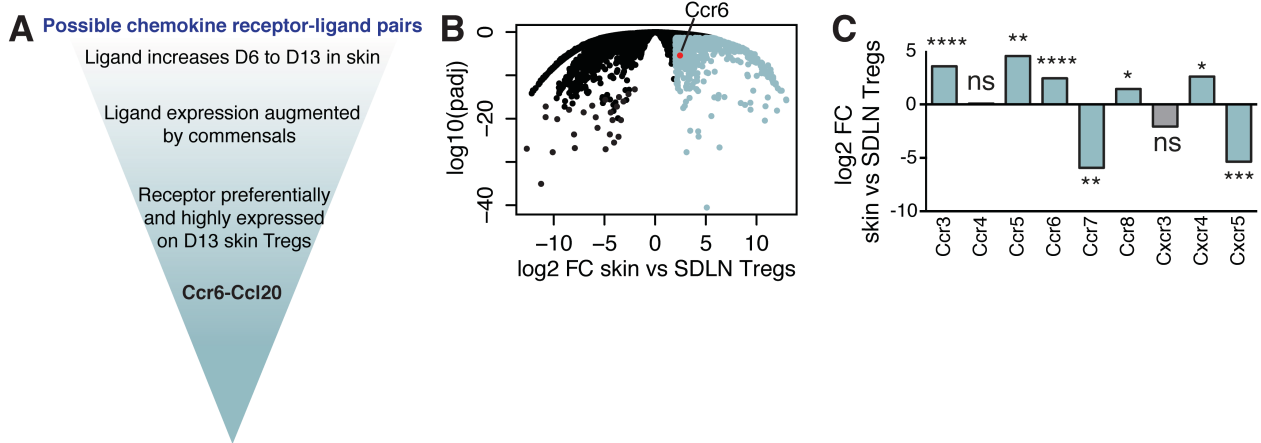

**Figure S1** (Related to Figure 3) Relative expression of chemokine receptors on neonatal skin vs. LN Treg cells by RNA sequencing

**(A)** Design of discovery approach to narrow chemokine-receptor candidates mediating Treg cell migration to neonatal skin. **(B)** Volcano plot of  $\log_2$ FC by  $\log_{10}(\text{adjusted p-value})$  of RNA sequencing data from D13 skin and LN Treg cells. Data point for Ccr6 depicted in red. **(C)**  $\log_2$ FC in D13 skin vs. LN Treg cells for receptors corresponding to chemokines increased in D13 skin. Blue = statistically significant difference.

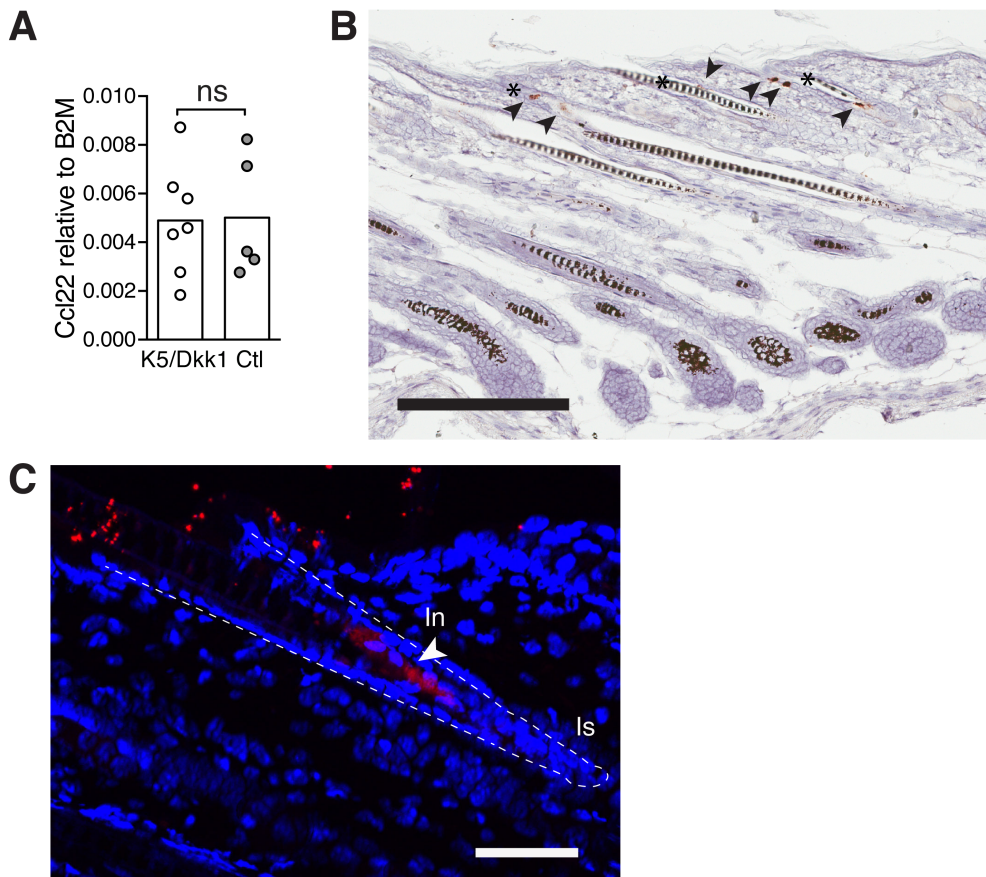

**Figure S2** (Related to Figure 4) Ccl20 but not Ccl22 is expressed in the infundibulum of neonatal hair follicles

**(A)** Fold change expression of Ccl22 vs. beta-2-microglobulin mRNA transcripts in skin from D13 K5/Dkk1 vs. Ctl littermates. **(B)** In situ hybridization for Ccl20 mRNA transcript in skin of D13 SPF mice. Arrows = visualization of Ccl20 mRNA signal. \* = hair follicle infundibulum. Scale bar = 200  $\mu$ m. **(C)** Neonatal mouse skin colonized with mCherry-expressing *S. epidermidis* (red), DAPI counterstain (blue), dashed line designates outline of hair follicle, arrowhead = mCherry signal in hair follicle, In = hair follicle infundibulum, Is = hair follicle isthmus, Scale bar = 50  $\mu$ m.

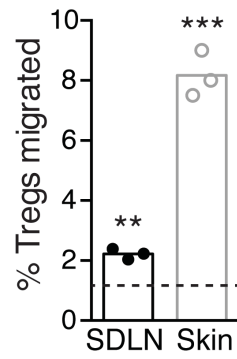

**Figure S3** (Related to Figure 6) Ccl20 induces migration of Treg cells from neonatal skin but not SDLN

Skin-draining lymph nodes (SDLN) and CD4<sup>+</sup> enriched skin lymphocytes were isolated from neonatal mice and incubated in a transwell system with Ccl20 (100ng/ml) or no chemokine. Percentage of Treg cells migrating to Ccl20 after 3 hours is depicted. P-values are in comparison to control wells with no chemokine, which for both populations yielded 1% of Tregs in the lower transwell. This control threshold is depicted by a dashed line. Each data point depicts a separate transwell. Data representative of two independent experiments.

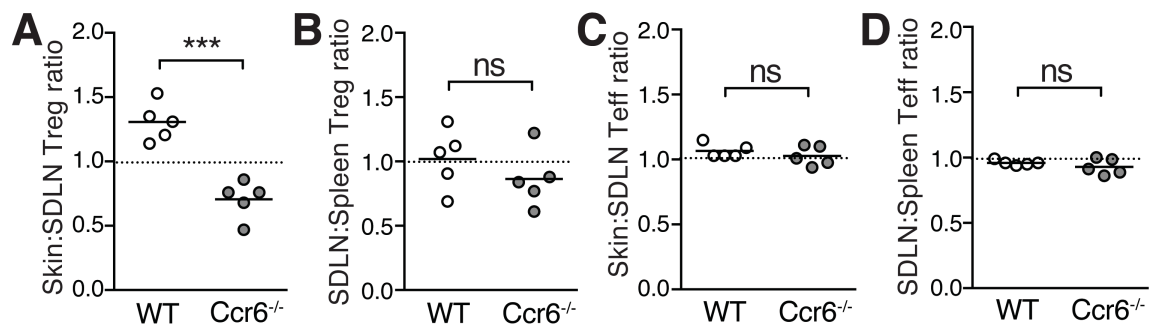

**Figure S4** (Related to Figure 7) Ccr6 directs Treg cell migration into neonatal skin but not lymphoid organs

**(A)** Skin:SDLN ratio for wt and Ccr6<sup>-/-</sup> Treg cells (i.e. % wt Treg cells in skin divided by % wt Treg cells in SDLN), **(B)** SDLN:Spleen ratio for wt and Ccr6<sup>-/-</sup> Treg cells, **(C)** Skin:SDLN ratio for wt and Ccr6<sup>-/-</sup> CD4<sup>+</sup> Teff cells, and **(D)** SDLN:Spleen ratio for wt and Ccr6<sup>-/-</sup> CD4<sup>+</sup> Teff cells.
